# Supplementary material for: The Effects of Moderate Alcohol Consumption on Circulating Metabolites and Gut Microbiota in Patients With Coronary Artery Disease
Source: PubMed Central journal article supplement (PMC8593214; doi:10.3389/fcvm.2021.767692), 2021-11-02
Supplement: Image_1.pdf [file Image_1.pdf]

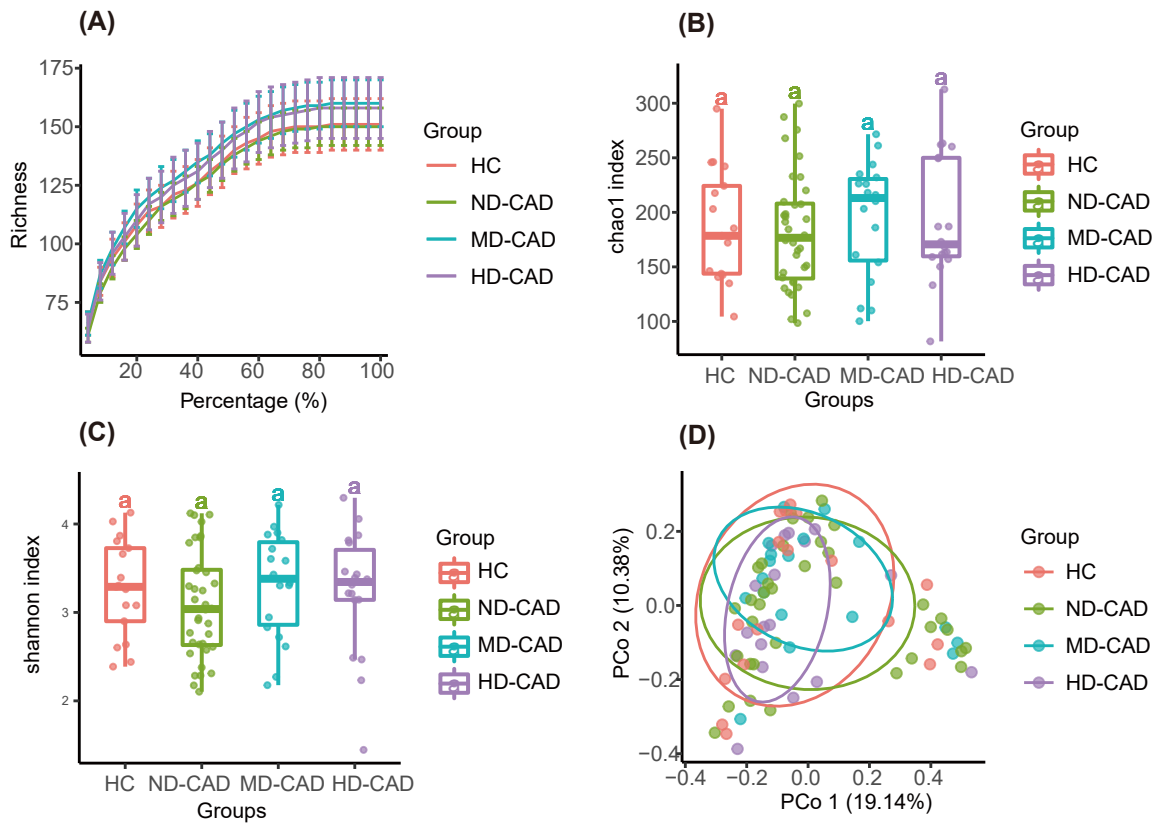

Figure S1| (A) Rarefaction curves. (B and C) Alpha diversity analyzed by chao1 index (B) and Shannon's index (C) (D) PCoA score plot of all samples by Bray-Curtis distances. (HC vs. ND-CAD:  $P=0.71$ ; HC vs. MD-CAD:  $P=0.75$ ; HC vs. HD-CAD:  $P=0.36$ ; ND-CAD vs. MD-CAD:  $P=0.72$ , ND-CAD vs. HD-CAD:  $P=0.24$ , MD-CAD vs. HD-CAD:  $P=0.27$ , Adonis test). ns: not specific.  $*P<0.05$ , Wilcoxon rank-sum test.
