# Supplementary material for: The Effects of Moderate Alcohol Consumption on Circulating Metabolites and Gut Microbiota in Patients With Coronary Artery Disease
Source: Front Cardiovasc Med. 2021 Nov 2;8:767692. doi: 10.3389/fcvm.2021.767692 (PMC8593214; doi:10.3389/fcvm.2021.767692)
Supplement: Supplementary file 1 [file Data_Sheet_1.xlsx]

## Sheet: Table S1
Table S1 The parameters of the metabolites in four modes analyzed by PLS-DA modeling
Mode	R2X(cum)	R2Y(cum)	Q2(cum)
Polar ionic negative (PLN)	0.442	0.492	-0.0968
Polar ionic positive (PLP)	0.276	0.626	-0.196
lipid negative (LPN)	0.715	0.206	-0.215
lipid positive (LPP)	0.462	0.404	-0.302

## Sheet: Table S2
Table S2 Information and classification of differential metabolic features associated with moderate alcohol consumption (as defined in "Materials and Methods", if the content of a metabolite in MD-CAD is significantly higher or lower than that in ND-CAD or HD-CAD, then the metabolite is associated with moderate alcohol consumption.
ID	P-value (MD-CAD VS. ND-CAD, Wilcoxon rank-sum test)	P-value (MD-CAD vs HD-CAD, Wilcoxon rank-sum test)	VIP(OPLS-DA)	enriched or depleted in MD-CAD	m/z	Retention time (min)	Formula	Classification	Possible compound	Database ID
LPP29	<0.05	<0.05	0.137782	depleted	799.174	0.500233	C28H32N8Na2O17	Heterocyclic Compounds, 1-Ring	Dantrolene sodium hemiheptahydrate	PubChem CID 9568637
PLP722	<0.05	<0.05	0.243574	enriched	276.191	5.93683	C11H23N7	Heterocyclic Compounds	Meladrazine	PubChem CID 71679
LPP1747	<0.05	<0.05	0.156538	depleted	724.794	0.507983	C7H7ClNa2O6P2S	Organophosphonates	sr 41319b	PubChem CID 60936
PLP2771	<0.05	<0.05	1.01063	enriched	647.362	10.7517	C17H25NO5	organonitrogen compound	alloxydim	PubChem CID 135571111
PLP6820	<0.05	<0.05	0.208011	depleted	252.06	5.08958	C16H12ClNO	organic cyclic compound	2-(p-Methoxyphenyl)-3-(m-chlorophenyl)acrylonitrile	PubChem CID 6141701
PLP866	<0.05	<0.05	0.322861	depleted	139.112	4.5698	C9H14O	Organooxygen compounds	(Z,Z)-3,6-Nonadienal	PubChem CID 5352808
LPP1904	<0.05	<0.05	0.0709503	enriched	698.32	1.69753	C37H43N5O6	Heterocyclic Compounds, 1-Ring	145DTK1W1Y	PubChem CID 461207
LPP1745	<0.05	<0.05	0.10974	depleted	343.037	0.5954	C18H16Cl2N2O2	Glycosides	4526	PubChem CID 4526
LPP199	<0.05	<0.05	0.188839	depleted	821.517	0.4923	C44H69NO12	Lactones	Tacrolimus	PubChem CID 445643
LPP137	<0.05	<0.05	0.237643	depleted	505.338	0.564817	C33H44O4	Prenol lipids	Eudesobovatol A	PubChem CID 442837
LPP496	<0.05	<0.05	0.124871	depleted	937.095	0.4771	C41H30O27	Glycosides	chebulagic acid	PubChem CID 442674
PLP7005	<0.05	<0.05	0.23233	enriched	237.146	9.58225	C12H22O3	Fatty Acyls	3-oxolauric acid	PubChem CID 439717
PLP2752	<0.05	<0.05	0.309513	depleted	188.095	2.34188	C6H10N4S	Heterocyclic Compounds, 1-Ring	Imetit	PubChem CID 3692
LPP1719	<0.05	<0.05	0.0648334	depleted	793.174	0.507983	C21H16O8	Not available	NOGALAVIKETONE	CSID30791360
PLP6817	<0.05	<0.05	0.324209	depleted	557.219	5.12533	C31H34O8	organooxygen compound	Sarothralin	PubChem CID 354448
PLP2368	<0.05	<0.05	0.89395	enriched	525.338	7.65992	C15H22N2O2	Not available	2-Hydroxy-5,6-didehydrospartein-10-one	CSID30791151
PLP2269	<0.05	<0.05	1.83413	enriched	525.338	7.65992	C15H22N2O2	Not available	2-Hydroxy-5,6-didehydrospartein-10-one	CSID30791151
PLP3733	<0.05	<0.05	0.410545	enriched	440.869	0.468567	CH4Na2O6P2	Not available	Medronate disodium	PubChem CID 33136
LPN391	<0.05	<0.05	1.68095	depleted	677.545	12.801	C20H37NO3	Carboxylic Acids	rociverine	PubChem CID 20059462
LPP1894	<0.05	<0.05	0.253699	depleted	768.424	1.78507	C34H59N9O12	Peptides	Larazotide acetate	PubChem CID 44146842
PLP4918	<0.05	<0.05	1.04497	depleted	171.991	0.361333	C4H5CaNO4	Amino Acids	Calcium (2S)-2-aminosuccinate	PubChem CID 30465
PLP5033	<0.05	<0.05	0.296614	enriched	567.32	11.0163	C18H21NO2	Amines	beloxamide	PubChem CID 27155
PLP3268	<0.05	<0.05	0.544542	enriched	385.177	8.91257	C21H27FO4	steroid	17,21-Epoxy-9-fluoro-11beta-hydroxyprogesterone	PubChem CID 240768
PLP154	<0.05	<0.05	3.1427	enriched	255.159	0.686917	C9H18N6	Heterocyclic Compounds, 1-Ring	Altretamine	PubChem CID 2123
PLP6713	<0.05	<0.05	0.224478	depleted	367.135	5.31767	C13H24N2O11	glycoside	Macrozamin	PubChem CID 9576780
PLP2524	<0.05	<0.05	0.823224	enriched	227.983	11.6728	C7H8ClNO2S	Not available	N-Chloro-4-methylbenzenesulfonimidic acid	PubChem CID 2724375
PLP3479	<0.05	<0.05	0.341648	enriched	559.322	9.58225	C14H21N3O3	Carboxylic Acids	Karbutilate	PubChem CID 312440
PLP784	<0.05	<0.05	2.4338	enriched	509.289	9.7204	C11H21N5S	Not available	Dipropetryn	PubChem SID 319076467
PLP2167	<0.05	<0.05	0.606993	enriched	277.965	11.8858	C8H5N3O3S2	Sulfur Compounds	Tenonitrozole	PubChem CID 19646
PLP2615	<0.05	<0.05	0.987834	enriched	545.306	7.65277	C16H20N2O2	Hydrocarbons, Aromatic	Ladostigil	PubChem CID 208907
PLP6903	<0.05	<0.05	0.273622	depleted	283.042	5.3956	C16H13ClN2S	Not available	sulazepam	PubChem CID 17931
PLN193	<0.05	<0.05	0.205044	enriched	647.372	10.7164	C37H56Cl2N2O3	Not available	Menabitan hydrochloride	PubChem CID 189876
LPP1714	<0.05	<0.05	0.156261	depleted	947.274	0.500233	C27H21ClFN3O2	Carboxylic Acids	lixivaptan	PubChem CID 172997
PLP3184	<0.05	<0.05	0.73994	depleted	265.98	2.74013	C12H7Cl2NO3	Benzene and substituted derivatives	nitrofen	PubChem CID 15787
LPP502	<0.05	<0.05	0.516204	depleted	780.495	0.564817	C8H5BrCl6	Hydrocarbons	5-(Bromomethyl)-1,2,3,4,7,7-hexachlorobicyclo[2.2.1]hept-2-ene	PubChem CID 15583
LPP1742	<0.05	<0.05	0.168747	depleted	493.312	10.6835	C29H37N3O2	organic heterocyclic compound	Deoxytubulosine	PubChem CID 165003
PLP2286	<0.05	<0.05	0.0714258	depleted	97.9446	11.7722	CuH2O2	Not available	Copper(II) hydroxide	PubChem CID 30154
PLP1963	<0.05	<0.05	0.553096	enriched	483.174	2.35707	C10H14N2O5	Glycosides	Telbivudine	PubChem CID 159269
PLP4805	<0.05	<0.05	0.102288	depleted	328.755	0.50515	C2Cl4	Hydrocarbons	Tetrachloroethylene	PubChem CID 31373
PLP3183	<0.05	<0.05	1.17434	enriched	671.448	10.8935	C17H38BrN	Not available	tetradonium bromide	PubChem CID 14250
PLP6411	<0.05	<0.05	1.03269	depleted	464.282	5.0188	C29H37NO4	Heterocyclic Compounds, 1-Ring	bucromarone	PubChem CID 132852
PLP2875	<0.05	<0.05	1.03777	depleted	337.258	10.5668	C18H29N3O2	Hydrocarbons, Aromatic	Dalcotidine	PubChem CID 129319
PLP1580	<0.05	<0.05	0.0567999	depleted	90.9768	8.6423	CH2ClF	Hydrocarbons, Chlorinated	Chlorofluoromethane	PubChem CID 11643
PLP354	<0.05	<0.05	0.606562	enriched	497.277	9.58965	C20H40N4O10	Glycosides	Geneticin	PubChem CID 123865
PLP903	<0.05	<0.05	0.265147	depleted	471.182	4.5555	C20H28N6O4S	Not available	Debrisoquin sulfate	PubChem CID 11391
PLP6736	<0.05	<0.05	0.241159	depleted	376.046	3.85122	C11H16N5O7PS	Purine nucleotides	6-Methylthioguanosine monophosphate	HMDB0060413
PLP6081	<0.05	<0.05	0.199854	depleted	379.112	7.005	C20H20O6	Furanoid lignans	(-)-Cubebin	HMDB0030682
PLP6161	<0.05	<0.05	0.2495	enriched	475.378	3.48718	C15H26O2	Tetrahydrofurans	alpha-Bisabolol oxide B	HMDB0038197
LPP1494	<0.05	<0.05	0.0804084	depleted	242.923	9.53835	C6H5IO	Hydrocarbons, Aromatic	2-Iodophenol	PubChem CID 10784
PLP3831	<0.05	<0.05	1.47516	depleted	619.289	0.854033	C30H42N2O9	Amides	Herbimycin A	PubChem CID 5311102
PLP2372	<0.05	<0.05	0.161833	enriched	288.053	7.65992	C7H14NO9P	Sugar Acids	4-Amino-5,6-dihydroxy-2-oxo-7-(phosphonooxy)heptanoic acid	PubChem CID 56928076
PLP6009	<0.05	<0.05	0.16408	enriched	333.159	5.57362	C21H22N2O3	Heterocyclic Compound	vomilenine	PubChem CID 11953806
PLP2367	<0.05	<0.05	0.235812	enriched	286.058	0.425683	C9H11F2N3O4	Glycosides	Gemcitabine	PubChem CID 60750
PLP2490	<0.05	<0.05	0.324253	enriched	175.119	0.583083	C11H14N2	Indoles and derivatives	3-(Dimethylaminomethyl)indole	HMDB0035762
PLP2438	<0.05	<0.05	0.483743	enriched	345.099	7.65277	C18H16O7	Flavonoids	Eupatorin	PubChem CID 97214
PLP5244	<0.05	<0.05	0.16458	enriched	274.059	0.69675	C11H13N3O2S	Sulfur Compounds	N-(2-Aminoethyl)-5-isoquinolinesulfonamide	PubChem CID 3544
PLP2246	<0.05	<0.05	4.6393	enriched	292.169	2.34188	C18H23NO	Not available	Orphenadrine	PubChem CID 4601
PLP5562	<0.05	<0.05	0.202684	enriched	327.014	0.5424	C16H15Cl3O2	Hydrocarbons, Chlorinated	Methoxychlor	PubChem CID 4115
PLP1787	<0.05	<0.05	0.811562	enriched	443.232	5.8732	C23H27N3O5	Not available	Tyr-Pro-Phe	PubChem CID 4670740
PLP785	<0.05	<0.05	6.48207	enriched	569.334	1.54927	C15H24O5	Prenol lipids	Dihydroartemisinin	PubChem CID 3000518
PLP4124	<0.05	<0.05	0.402309	depleted	132.077	0.5278	C9H11NO	Heterocyclic Compounds	S(-)-Cathinone	PubChem CID 62258
PLP6301	<0.05	<0.05	0.493238	depleted	585.288	0.5491	C29H44O12	Glycosides	Ouabain	PubChem CID 439501
PLP6395	<0.05	<0.05	0.104478	depleted	246.133	6.6275	C15H21NOS	organic heterocyclic compound	Dimepiperate	PubChem CID 91679
PLP1994	<0.05	<0.05	0.181914	enriched	311.16	2.31328	C19H24N2OS	Benzothiazines	Levomepromazine	PubChem CID 72287
PLP2001	<0.05	<0.05	0.230578	enriched	795.336	9.35567	C22H24FN3OS	Sulfur Compounds	Timiperone	PubChem CID 3033151
PLP4864	<0.05	<0.05	0.203258	depleted	158.153	0.51945	C9H16O	Fatty Acyls	trans,cis-3,6-Nonadien-1-ol	PubChem CID 5365706
PLP2428	<0.05	<0.05	0.199496	enriched	325.215	6.92637	C17H25NO4	Heterocyclic Compounds, 1-Ring	Buflomedil	PubChem CID 2467
PLP3014	<0.05	<0.05	0.411739	depleted	338.28	10.798	C19H32N2O2	Amino Acid	Camylofine	PubChem CID 5902
PLP7081	<0.05	<0.05	1.66671	enriched	197.042	0.553167	C9H10O5	Benzene and substituted derivatives	Syringic acid	HMDB0002085
PLP2257	<0.05	<0.05	0.20925	depleted	162.126	2.38408	C11H17NO	Not available	(1S, 2S)-(+)-N-Methylpseudoephedrine	PubChem CID 7059595
PLP6139	<0.05	<0.05	0.0555919	depleted	251.198	4.71922	C6H11N3	Organonitrogen compounds	1-Methylhistamine	HMDB0000898
PLP1519	<0.05	<0.05	0.16532	depleted	209.011	2.72583	C9H6O7	Not available	2,4,5-Phenoltricarboxylic acid	PubChem SID 52549260
PLP120	<0.05	<0.05	0.448319	depleted	333.166	6.01548	C14H30O5S	Polymers	Ethylene glycol dodecyl ether sulfate	PubChem CID 24761
PLP2049	<0.05	<0.05	1.87375	enriched	423.181	0.56455	C13H12N2O	Harmala alkaloids	Harmine	HMDB0030311
PLP6282	<0.05	<0.05	0.168711	depleted	833.363	11.6146	C24H29ClO4	Steroids and steroid derivatives	Cyproterone acetate	HMDB0015587
PLP6295	<0.05	<0.05	0.406944	depleted	227.028	7.65992	C11H8O4	Not available	3-Formyl-7-methoxychromone	PubChem CID 10965610
PLP2414	<0.05	<0.05	0.120273	depleted	255.114	10.9157	C12H20N2O3S	Benzene and substituted derivatives	Sotalol	HMDB0014632
PLP2954	<0.05	<0.05	0.45726	depleted	315.217	10.7157	C18H23N3O	Heterocyclic Compounds, 1-Ring	4-(Isopropylamino)-2-(2-pyridyl)-2-phenylbutyramide	PubChem CID 107858
PLP2816	<0.05	<0.05	1.04612	depleted	208.168	5.95828	C13H21NO	Not available	(1S,2R)-2-(Diethylamino)-1-phenyl-1-propanol	PubChem CID 12235157
PLP2805	<0.05	<0.05	0.273572	depleted	419.314	11.4169	C21H39NO6	Antifungal Agents	Myriocin	PubChem CID 6438394
PLP5113	<0.05	<0.05	0.132827	depleted	109.101	5.239	C4H12P+	Organophosphorus Compounds	Tetramethylphosphonium cation	PubChem CID 120512
PLP6819	<0.05	<0.05	0.169299	depleted	317.07	5.09673	C16H19BrN2O	Not available	5-Bromo-7-((4-methyl-1-piperidinyl)methyl)-8-quinolinol	PubChem CID 678742
LPP1571	<0.05	<0.05	0.0691765	depleted	645.076	0.469517	C14H15BrN2O2	Not available	2-(((5-Bromo-3-methyl-2-pyridinyl)amino)methyl)-6-methoxyphenol	PubChem CID 683108
LPP880	<0.05	<0.05	1.63704	depleted	617.512	13.8021	C37H70O5	Glycerolipids	1-Palmitoyl-2-oleoyl-sn-glycerol	PubChem CID 5282283
PLP2209	<0.05	<0.05	0.340371	enriched	389.148	8.0017	C18H26N2O4S	Sulfur Compounds	Glibornuride	PubChem CID 12818200
PLP6808	<0.05	<0.05	0.17412	enriched	363.074	5.10388	C12H16N3O3PS2	Sulfur Compounds	Azinphos-ethyl	PubChem CID 17531
PLP683	<0.05	<0.05	0.74125	depleted	279.098	6.62033	C18H16O4	Not available	7-Ethoxy-3-(4-methoxyphenyl)coumarin	PubChem CID 688957
PLP835	<0.05	<0.05	21.1821	enriched	595.35	0.662817	C17H22N4O	Diazines	Minaprine	HMDB0014943
PLP6809	<0.05	<0.05	0.223837	depleted	349.15	2.81165	C19H19ClFNO	Not available	3-(4-tert-Butylphenyl)-N-(3-chloro-4-fluorophenyl)acrylamide	PubChem CID 5713322
PLP2341	<0.05	<0.05	0.200573	enriched	263.2	6.72687	C12H23NO4	organonitrogen compound	2-Methylbutyrylcarnitine	PubChem CID 6426901
PLP4488	<0.05	<0.05	0.189889	depleted	238.061	4.3424	C13H9N3O3	Not available	5-(3-Indolylmethylene)barbituric acid	PubChem CID 135400591
PLP1511	<0.05	<0.05	0.270797	enriched	211.142	2.30615	C9H20N2O2	Carboxylic Acids	Propamocarb	PubChem CID 32490
PLP2886	<0.05	<0.05	1.03918	depleted	449.36	13.2148	C26H50O4	Not available	Dioctyl sebacate	PubChem CID 75516
PLP2571	<0.05	<0.05	0.744697	enriched	312.216	0.59065	C17H26O4	Phenols	[6]-Gingerol	HMDB0005783
PLP2180	<0.05	<0.05	0.144859	depleted	361.114	8.0017	C21H18N2O5	Heterocyclic Compounds	10-Methoxycamptothecin	PubChem CID 97283
PLP2975	<0.05	<0.05	0.492916	depleted	206.152	2.2704	C8H16N2O3	peptide	Glycyl-L-norleucine	PubChem CID 273080
PLP3197	<0.05	<0.05	0.274968	depleted	206.152	2.2704	C8H16N2O3	peptide	Glycyl-L-norleucine	PubChem CID 273080
PLP2089	<0.05	<0.05	0.129595	depleted	357.089	7.8594	C5H10N2O3S	Peptides	Cys-Gly	PubChem CID 439498
PLP1327	<0.05	<0.05	0.340737	depleted	480.851	18.7792	C6H3Cl3N2O2	Heterocyclic Compounds, 1-Ring	Picloram	PubChem CID 15965
PLP2433	<0.05	<0.05	0.922731	enriched	246.074	0.497917	C8H15N3O7	Organooxygen compounds	Streptozocin	HMDB0014572
PLP6727	<0.05	<0.05	0.113695	depleted	350.061	3.84407	C16H12F3N3O2S	Enzyme	4-[5-Phenyl-3-(trifluoromethyl)-1H-pyrazol-1-yl] benzenesulfonamide	PubChem CID 6426663
PLP2191	<0.05	<0.05	0.284553	enriched	199.13	3.93632	C9H13N2O2+	Heterocyclic Compounds, 1-Ring	Pyridostigmine cation	PubChem CID 4991
PLP5058	<0.05	<0.05	0.250948	depleted	295.145	0.6326	C6H12O4	Fatty Acyls	Mevalonic acid	HMDB0000227
PLP1785	<0.05	<0.05	0.137944	enriched	603.323	2.92435	C15H27O4P	Not available	alpha-Hydroxy farnesyl phosphonic acid	PubChem CID 57348291
PLP2214	<0.05	<0.05	0.189267	depleted	401.152	3.95775	C13H13P	Not available	Diphenylmethylphosphine	PubChem CID 73879
PLP6101	<0.05	<0.05	0.944015	depleted	311.125	8.20832	C19H20O5	Enzyme	2,2',4',6'-Tetramethoxychalcone	PubChem CID 5945562
PLP5949	<0.05	<0.05	0.169378	enriched	185.056	0.525317	C11H12N2S	Imidazothiazoles	Levamisole	HMDB0014986
PLP3684	<0.05	<0.05	1.86086	depleted	154.122	0.7039	C9H17NO2	Not available	Proline, butyl ester	PubChem CID 6426964
PLP2437	<0.05	<0.05	0.495194	enriched	324.046	0.59065	C10H12ClN5O4	Glycosides	2-Chloroadenosine	PubChem CID 8974
PLP4300	<0.05	<0.05	0.409521	depleted	299.109	9.58965	C15H11N3O3	Heterocyclic Compounds, 2-Ring	Nitrazepam	PubChem CID 4506
LPP872	<0.05	<0.05	2.10507	depleted	895.717	17.0885	C28H49NOS	Amines	N-(2,6-Diisopropylphenyl)tetradecylthioacetamide	PubChem CID 6426883
PLP6345	<0.05	<0.05	0.290891	depleted	265.143	18.5515	C15H20O4	Prenol lipids	(+-)-2-cis-4-trans-Abscisic acid	HMDB0035140
PLP2764	<0.05	<0.05	1.66791	enriched	198.09	10.7365	C8H13N3O4	Not available	4-Ethyl-2E-(hydroxyimino)-5-nitro-3E-hexenamide	PubChem CID 6413529
PLP6531	<0.05	<0.05	0.173625	depleted	497.334	0.558733	C15H23NO2	Phenol ethers	Alprenolol	HMDB0015004
PLP3824	<0.05	<0.05	0.165518	enriched	252.045	3.30998	C8H11N3O3S	Nucleoside and nucleotide analogues	Lamivudine	HMDB0014847
PLP777	<0.05	<0.05	0.675212	enriched	313.15	7.65277	C17H20N4S	Benzodiazepines	Olanzapine	HMDB0005012
PLP3968	<0.05	<0.05	0.242277	depleted	292.109	0.69675	C15H14O5	Not available	2,2'-Dihydroxy-4,4'-dimethoxybenzophenone	PubChem CID 8570
PLP2881	<0.05	<0.05	0.240795	depleted	254.138	2.15672	C11H21NO4	Not available	N-.alpha.-(tert-Butoxycarbonyl)-L-Isoleucine	PubChem CID 2724762
PLP4934	<0.05	<0.05	0.294819	enriched	324.215	0.105367	C18H26O4	Carboxylic Acids	Di-n-pentyl phthalate	PubChem CID 8561
PLP4943	<0.05	<0.05	0.294596	enriched	324.215	0.105367	C18H26O4	Carboxylic Acids	Di-n-pentyl phthalate	PubChem CID 8561
PLP5003	<0.05	<0.05	0.610663	depleted	1153.27	0.482883	C30H24O12	Flavonoids	Procyanidin A1	HMDB0037656
PLP2185	<0.05	<0.05	0.592129	enriched	298.073	8.0017	C14H13NO5	Carboxylic Acids	Lavendustin C	PubChem CID 3896
PLP5923	<0.05	<0.05	0.388881	enriched	195.149	0.624667	C11H15NO	Amines	4-Methylmethcathinone	PubChem CID 45266826
PLP6624	<0.05	<0.05	0.346714	depleted	391.284	17.1662	C24H38O4	Carboxylic Acids	Dioctyl phthalate	PubChem CID 8346
PLP1020	<0.05	<0.05	0.59157	depleted	273.109	5.4242	C16H16O4	Not available	6,7-Diallyloxy-4-methylcoumarin	PubChem CID 3887934
PLP2436	<0.05	<0.05	0.628509	enriched	245.176	0.59065	C7H10N2	Amines	4-Pyridinamine, N,N-dimethyl-	PubChem CID 14284
PLP3190	<0.05	<0.05	1.24007	depleted	138.127	2.17102	C7H17N	Not available	1-Heptanamine	PubChem CID 8127
PLP5290	<0.05	<0.05	0.118984	depleted	88.0752	0.368483	C4H11NO2	Organonitrogen compounds	Diethanolamine	HMDB0004437
LPP1454	<0.05	<0.05	0.102291	depleted	321.156	0.564817	C7H12O4	Fatty Acyls	Pimelic acid	HMDB0000857
PLP6908	<0.05	<0.05	0.421934	depleted	134.096	2.17817	C4H8N2O2	Fatty Acyls	Succinamide	PubChem CID 8036
PLP1627	<0.05	<0.05	0.105926	depleted	337.274	13.2697	C21H36O3	Not available	5.beta.-Pregnane-3.alpha.,17.alpha.,20.alpha.-triol	PubChem CID 6429573
PLP3157	<0.05	<0.05	0.835015	depleted	179.142	7.3961	C10H20O	Prenol lipids	beta-Citronellol	PubChem CID 8842
PLP2250	<0.05	<0.05	1.37552	enriched	517.37	8.74168	C14H26O4	Carboxylic Acids	Dibutyl adipate	PubChem CID 7784
PLP6680	<0.05	<0.05	0.350797	depleted	233.099	2.10667	C5H8O3	Keto acids and derivatives	Methyl acetoacetate	HMDB0000310
PLP3804	<0.05	<0.05	0.402664	enriched	519.26	10.1479	C26H38F2N2O5	Not available	Flumethasone, 3,20-bisethoxime	PubChem CID 9604453
PLP5230	<0.05	<0.05	0.198577	depleted	136.075	0.683167	C8H9NO	Benzene and substituted derivatives	2-Phenylacetamide	HMDB0010715
PLP4198	<0.05	<0.05	0.115303	depleted	136.075	0.683167	C8H9NO	Benzene and substituted derivatives	2-Phenylacetamide	HMDB0010715
PLP6785	<0.05	<0.05	0.700514	depleted	186.221	3.66605	C12H27N	Amines	Tributylamine	PubChem CID 7622
PLP5750	<0.05	<0.05	0.243956	enriched	159.035	2.59787	C2H8NO2PS	Organothiophosphorus compounds	Methamidophos	HMDB0031803
PLP2108	<0.05	<0.05	0.329354	enriched	352.224	6.40658	C20H30O4	Fatty Acyls	12S-Hydroperoxy-5Z,8Z,10E,14Z,17Z-eicosapentaenoic acid	PubChem CID 5283195
PLP3747	<0.05	<0.05	0.464213	enriched	337.104	11.2916	C18H18O5	Polyketides	2'-Hydroxy-2,4,6'-trimethoxychalcone	PubChem CID 637261
PLP3279	<0.05	<0.05	0.134916	enriched	167.092	9.56103	C12H12N2	Amines	1,4-Benzenediamine, N-phenyl-	PubChem CID 7564
PLP716	<0.05	<0.05	1.70743	enriched	319.223	8.11537	C18H32O3	Fatty Acyls	9R-Hydroxy-10E,12Z-octadecadienoic acid	PubChem CID 16061059
PLP6646	<0.05	<0.05	0.232359	depleted	309.126	6.9049	C4H6N6O	Nitroso Compounds	5-Nitrosopyrimidine-2,4,6-triamine	PubChem CID 70504
PLP4140	<0.05	<0.05	0.285822	depleted	217.12	9.35567	C7H8O	Benzene and substituted derivatives	Benzyl alcohol	HMDB0003119
PLP2489	<0.05	<0.05	0.256249	enriched	272.257	5.68087	C16H30O2	Fatty Acyls	Palmitelaidic acid	HMDB0012328
LPP1778	<0.05	<0.05	0.127512	depleted	793.499	0.4923	C18H32N6O4	peptide	His-Ile-Lys	PubChem CID 145455877
PLP3049	<0.05	<0.05	0.316365	depleted	833.439	9.35567	C15H28N8O6	peptide	Gln-Asn-Arg	PubChem CID 145454979
PLP3067	<0.05	<0.05	0.752271	depleted	376.26	0.6989	C16H33N5O5	peptide	Lys-Thr-Lys	PubChem CID 444465
PLP2774	<0.05	<0.05	0.451121	enriched	283.177	8.0017	C16H24N2O	Not available	Milnacipran, paramethyl	PubChem CID 92044018
PLP2190	<0.05	<0.05	0.284993	enriched	306.19	2.2132	C10H20N6O4	peptide	Asn-Arg	PubChem CID 9835593
LPP906	<0.05	<0.05	1.03794	depleted	855.736	16.7752	C55H98O6	Glycerolipids	TG(14:0/16:0/22:4(7Z,10Z,13Z,16Z))[iso6]	PubChem CID 56938033
LPP72	<0.05	<0.05	13.2123	depleted	874.787	17.094	C55H100O6	Glycerolipids	TG(14:0/16:0/22:3(10Z,13Z,16Z))[iso6]	PubChem CID 56938032
PLP2295	<0.05	<0.05	0.267594	depleted	328.248	0.643933	C18H30O4	Fatty Acyls	9(S)-HpOTrE	PubChem CID 6450029
LPP950	<0.05	<0.05	0.407087	depleted	945.854	16.7697	C32H56O2	Fatty Acyls	32:4(17Z,20Z,23Z,26Z)	PubChem CID 52919352
LPN403	<0.05	<0.05	1.37218	depleted	649.514	13.7005	C20H23D7O3	Fatty Acyls	5-Oxo-ETE-d7	PubChem CID 16061124
LPN208	<0.05	<0.05	1.89816	depleted	885.551	6.56788	C47H83O13P	Glycerophospholipids	PI(20:4(5Z,8Z,11Z,14Z)/18:0)	PubChem SID 123065617
LPN207	<0.05	<0.05	1.06865	depleted	953.542	6.56788	C49H81O13P	Glycerophospholipids	PI(18:1(9Z)/22:6(4Z,7Z,10Z,13Z,16Z,19Z))	PubChem SID 123065032
LPP1453	<0.05	<0.05	0.265538	depleted	872.577	13.0165	C50H84NO10P	Glycerophospholipids	PS(22:1(11Z)/22:6(4Z,7Z,10Z,13Z,16Z,19Z))	PubChem SID 123063420
LPP911	<0.05	<0.05	2.40315	depleted	917.7	16.6591	C50H94NO10P	Glycerophospholipids	PS(22:0/22:2(13Z,16Z))	PubChem SID 123063388
LPP960	<0.05	<0.05	1.18212	depleted	917.7	16.6591	C50H94NO10P	Glycerophospholipids	PS(22:0/22:2(13Z,16Z))	PubChem SID 123063388
LPP863	<0.05	<0.05	1.82351	depleted	919.715	16.8081	C50H96NO10P	Glycerophospholipids	PS(22:0/22:1(11Z))	PubChem SID 123063387
LPP932	<0.05	<0.05	1.58666	depleted	856.645	13.0229	C48H92NO10P	Glycerophospholipids	PS(20:0/22:1(11Z))	PubChem SID 123063190
LPP1438	<0.05	<0.05	0.429214	depleted	782.517	0.5308	C46H76NO8P	Glycerophospholipids	PC(18:3(6Z,9Z,12Z)/20:5(5Z,8Z,11Z,14Z,17Z))	PubChem SID 123060952
PLP2658	<0.05	<0.05	0.14296	enriched	328.248	0.643933	C18H30O4	Fatty Acyls	13(S)-HpOTrE	PubChem CID5497123
LPP1520	<0.05	<0.05	0.187017	depleted	621.391	0.514733	C32H54O10	Steroid conjugates	Kurilensoside G	PubChem CID 52931570
LPP138	<0.05	<0.05	0.24974	depleted	394.27	0.564817	C19H40NO5P	Sphingolipids	C19 Sphingosine-1-phosphate	PubChem CID 52931109
LPP1751	<0.05	<0.05	0.0863286	depleted	881.303	0.484633	C24H24O8	Flavonoids	(+)-12a-Hydroxyerythynone	PubChem CID 14704461
PLN2409	<0.05	<0.05	0.253997	depleted	937.821	18.0627	C59H110O6	Glycerolipids	TG(16:0/20:1(11Z)/20:1(11Z))[iso3]	HMDB05386
PLN2541	<0.05	<0.05	0.237386	enriched	819.815	9.97328	C27H54O2	Fatty Acyls	Heptacosanoic acid	HMDB02063
LPP1458	<0.05	<0.05	0.353469	depleted	868.547	0.564817	C50H80NO10P	Glycerophospholipids	PS(22:4(7Z,10Z,13Z,16Z)/22:5(4Z,7Z,10Z,13Z,16Z))	HMDB0112811
PLP4942	<0.05	<0.05	0.34837	enriched	314.913	0.0910667	C5H4BrN	Pyridines and derivatives	12,13-epoxy-9-alkoxy-10E-octadecenoate	HMDB0062289
LPN404	<0.05	<0.05	0.69702	depleted	609.557	12.814	C42H74O2	Steroids and steroid derivatives	CE(15:0)	HMDB0060057
PLP6874	<0.05	<0.05	0.27012	depleted	536.102	5.3956	C18H26N5O8PS2	Purine nucleotides	lipoyl-AMP	HMDB0059635
LPP857	<0.05	<0.05	3.47425	depleted	968.864	16.7972	C62H110O6	Glycerolipids	TG(15:0/22:0/22:5(4Z,7Z,10Z,13Z,16Z))	HMDB0043126
LPP1041	<0.05	<0.05	2.40463	depleted	970.88	17.122	C62H112O6	Glycerolipids	TG(15:0/22:0/22:4(7Z,10Z,13Z,16Z))	HMDB0043125
LPP874	<0.05	<0.05	3.83242	depleted	944.865	17.094	C60H110O6	Glycerolipids	TG(15:0/22:0/20:3(5Z,8Z,11Z))	HMDB0043116
LPP940	<0.05	<0.05	1.53552	depleted	933.769	0.558733	C58H106O6	Glycerolipids	TG(15:0/20:0/20:3(5Z,8Z,11Z))	HMDB0043087
PLP5088	<0.05	<0.05	1.09052	depleted	914.813	0.482883	C58H104O6	Glycerolipids	TG(15:0/18:0/22:4(7Z,10Z,13Z,16Z))	HMDB0043067
LPP883	<0.05	<0.05	1.51236	depleted	918.847	17.0606	C58H108O6	Glycerolipids	TG(15:0/18:0/22:2(13Z,16Z))	HMDB0043066
LPP192	<0.05	<0.05	1.21035	depleted	891.742	16.9452	C56H100O6	Glycerolipids	TG(15:0/16:0/22:4(7Z,10Z,13Z,16Z))	HMDB0043038
LPP454	<0.05	<0.05	0.246144	depleted	1035.41	0.469517	C60H56N2O13	Prenol lipids	Gossypurpurin	HMDB0040913
LPN428	<0.05	<0.05	0.237285	depleted	1333.58	13.0018	C60H98O30	Prenol lipids	Araliasaponin VIII	HMDB0037259
LPP1792	<0.05	<0.05	0.132971	depleted	905.323	0.484633	C23H29ClO7	Prenol lipids	Melleolide M	HMDB0035068
PLP851	<0.05	<0.05	0.144371	depleted	345.153	0.576683	C16H26O8	Prenol lipids	(1R,3S,4S,6R)-6,9-Dihydroxyfenchone 6-O-b-D-glucoside	HMDB0033222
LPN407	<0.05	<0.05	0.52696	depleted	431.316	1.76727	C26H42O2	Organooxygen compounds	1-Phenyl-1,3-eicosanedione	HMDB0032925
PLP833	<0.05	<0.05	3.4289	enriched	297.145	8.0017	C14H17NO5	Organooxygen compounds	Niazirin	HMDB0032807
LPP881	<0.05	<0.05	1.67432	depleted	597.486	8.09962	C37H66O4	Fatty Acyls	Montecristin	HMDB0029795
LPN548	<0.05	<0.05	0.692695	depleted	1166.5	6.44597	C52H73N15O12S	Polypeptides	Neuromedin B	HMDB0013018
LPN288	<0.05	<0.05	0.802727	depleted	803.629	10.7218	C43H87N2O6P	Sphingolipids	SM(d18:1/20:0)	HMDB0012102
LPN77	<0.05	<0.05	1.33432	depleted	831.661	13.0381	C45H91N2O6P	Sphingolipids	SM(d18:0/22:1(13Z))	HMDB0012092
LPP905	<0.05	<0.05	2.47102	depleted	641.512	13.2642	C39H70O5	Glycerolipids	DG(14:1(9Z)/22:2(13Z,16Z)/0:0)	HMDB0007059
LPP853	<0.05	<0.05	1.84142	depleted	639.496	11.9709	C39H68O5	Glycerolipids	DG(14:0/22:4(7Z,10Z,13Z,16Z)/0:0)	HMDB0007031
LPP289	<0.05	<0.05	3.75491	depleted	927.741	16.6756	C59H100O6	Glycerolipids	TG(18:1(9Z)/18:2(9Z,12Z)/20:4(5Z,8Z,11Z,14Z))	HMDB0005462
LPP879	<0.05	<0.05	1.59434	depleted	941.85	18.5918	C61H112O6	Glycerolipids	TG(18:1(9Z)/20:1(11Z)/20:1(11Z))	HMDB0005457
LPP858	<0.05	<0.05	1.50647	depleted	982.879	16.7972	C63H112O6	Glycerolipids	TG(20:0/20:1(11Z)/20:4(5Z,8Z,11Z,14Z))	HMDB0005419
LPP1045	<0.05	<0.05	0.943449	depleted	984.895	17.1274	C63H114O6	Glycerolipids	TG(20:0/20:0/20:4(5Z,8Z,11Z,14Z))	HMDB0005416
LPP324	<0.05	<0.05	8.90852	depleted	901.726	16.6701	C57H98O6	Glycerolipids	TG(16:0/18:2(9Z,12Z)/20:4(5Z,8Z,11Z,14Z))	HMDB0005391
LPP296	<0.05	<0.05	3.40769	depleted	901.726	16.6701	C57H98O6	Glycerolipids	TG(16:0/18:2(9Z,12Z)/20:4(5Z,8Z,11Z,14Z))	HMDB0005391
LPP855	<0.05	<0.05	10.2132	depleted	898.787	16.7917	C57H100O6	Glycerolipids	TG(16:0/18:1(9Z)/20:4(5Z,8Z,11Z,14Z))	HMDB0005385
LPP1037	<0.05	<0.05	7.82636	depleted	900.803	17.1107	C57H102O6	Glycerolipids	TG(16:0/18:0/20:4(5Z,8Z,11Z,14Z))	HMDB0005370
LPP1044	<0.05	<0.05	4.26416	depleted	900.803	17.1107	C57H102O6	Glycerolipids	TG(16:0/18:0/20:4(5Z,8Z,11Z,14Z))	HMDB0005370
LPP870	<0.05	<0.05	4.4696	depleted	848.771	17.0772	C53H98O6	Glycerolipids	TG(16:0/16:0/18:2(9Z,12Z))	HMDB0005362
ID is given by PubChem or HMDB database.
https://pubchem.ncbi.nlm.nih.gov/; https://hmdb.ca/

## Sheet: Table S3
Table S3 Metabolic pathway enrichment analysis was performed by using MetaboAnalyst
Pathway name	Total	Hits	Raw P	Holm adjust P	Impact-value
Linoleic acid metabolism	5	1	0.090225	1	0
Lipoic acid metabolism	8	1	0.14053	1	0.16667
Arachidonic acid metabolism	36	2	0.14416	1	0
alpha-Linolenic acid metabolism	13	1	0.21846	1	0
Glycerolipid metabolism	16	1	0.2619	1	0.01402
Histidine metabolism	16	1	0.2619	1	0.09016
Terpenoid backbone biosynthesis	18	1	0.28955	1	0.11429
Sphingolipid metabolism	21	1	0.32916	1	0
Glutathione metabolism	28	1	0.41347	1	0.0568
Glycerophospholipid metabolism	36	1	0.49732	1	0.09446
Total represents the total number of compounds involved in the pathway; Hits is the actually matched number from the uploaded data; Raw P is the p-value calculated by the pathway topology analysis; Holm P is the p-value adjusted by the Holm–Bonferroni method; Impact is the impact-value calculated by pathway topology analysis.

## Sheet: Table S4
Table S4: The relative abundance of four dominant phyla in gut microbiota in each group
Relative abundance	HC	ND-CAD	MD-CAD	HD-CAD	P-value	P-value(HC vs. ND-CAD)	P-value(HC vs. MD-CAD)	P-value(HC vs. HD-CAD)	P-value(ND-CAD vs. MD-CAD)	P-value(ND-CAD vs. HD-CAD)	P-value(MD-CAD vs. HD-CAD)
Firmicutes	55.12±14.10	49.03±17.92	54.24±17.33	53.22±20.87	0.596 a	0.223 c	0.870 c	0.756 c	0.313 c	0.446 c	0.874 c
Bacteroidetes	34.59±11.62	40.23±20.00	40.50±18.29	29.27±18.94	0.179 a	0.549 c	0.581 c	0.129 c	0.962 c	0.059 c	0.079 c
Proteobacteria	2.58(1.50,6.49)	3.36(1.33,8.42)	2.11(1.12,3.51)	2.58(1.50,6.49)	0.134 b	0.962 d	0.176 d	0.192 d	0.219 d	0.196 d	0.019 d
Actinobacteria	0.77(0.36,1.50)	1.32(0.34,4.69)	0.67(0.17,2.57)	1.86(0.67,6.85)	0.248 b	0.493 d	0.934 d	0.062 d	0.345 d	0.259 d	0.094 d
a. P-value among the four groups analyzed by one-way ANOVA test. b. P-value among the four groups analyzed by Kruskal-Wallis H test. c. P-value analyzed by Student's t test. d. P-value analyzed by Mann-Whitney U test.

## Sheet: Table S5
Table S5 The differential OTUs associated with moderate alcohol consumption
ID	Phylum	Order	Class	Family	Genus	Species	level	Mean(HC)	Mean(ND-CAD)	Mean(MD-CAD)	Mean (HD-CAD)	P-value (MD-CAD vs. HC)	FDR (MD-CAD vs. HC)	P-value (MD-CAD vs. ND-CAD)	FDR (MD-CAD vs. ND-CAD)	P-value (MD-CAD vs. HD-CAD)	FDR (MD-CAD vs. HD-CAD)
OTU 12	Actinobacteria	Actinobacteria	Bifidobacteriales	Bifidobacteriaceae	Bifidobacterium	Bifidobacterium longum	Depleted in MD-CAD	0.236	0.947	0.273	4.028	0.520587	0.862414	0.000821744	0.0444581	1.00486e-07	1.33647e-05
OTU 13	Actinobacteria	Actinobacteria	Bifidobacteriales	Bifidobacteriaceae	Bifidobacterium	Bifidobacterium catenulatum	Depleted in MD-CAD	0.461	1.497	0.289	0.602	0.39	0.762795	0.000378681	0.0444581	0.119827	0.354112
OTU 127	Firmicutes	Clostridia	Clostridiales	Lachnospiraceae	Unassigned	Unassigned	Depleted in MD-CAD	0.152	0.203	0	0.05	0.0291347	0.258328	0.00842147	0.109648	0.0180427	0.125247
OTU 135	Bacteroidetes	Bacteroidia	Bacteroidales	Bacteroidaceae	Bacteroides	Bacteroides ovatus	Depleted in MD-CAD	0.758	1.251	0.738	2.702	0.47522	0.862414	0.0178575	0.146155	0.000787966	0.0174666
OTU 14	Bacteroidetes	Bacteroidia	Bacteroidales	Bacteroidaceae	Bacteroides	Bacteroides coprocola	Depleted in MD-CAD	1.279	0.448	0.073	0.527	0.0184716	0.258328	0.0280658	0.186638	0.0719496	0.299041
OTU 155	Bacteroidetes	Bacteroidia	Bacteroidales	Prevotellaceae	Prevotella	Prevotella stercorea	Enriched in MD-CAD	0.027	0.006	0.719	0.001	0.169977	0.683145	0.00360829	0.109648	0.00393575	0.0475868
OTU 171	Bacteroidetes	Bacteroidia	Bacteroidales	Prevotellaceae	Prevotella	Unassigned	Enriched in MD-CAD	0.027	0.001	0.571	0	0.206055	0.683145	0.00989303	0.109648	0.00226174	0.0331171
OTU 175	Bacteroidetes	Bacteroidia	Bacteroidales	Prevotellaceae	Alloprevotella	Alloprevotella rava	Depleted in MD-CAD	0.137	0.2	0	0.328	0.00716463	0.190579	0.00926362	0.109648	0.00169766	0.0322555
OTU 19	Firmicutes	Bacilli	Lactobacillales	Enterococcaceae	Enterococcus	Enterococcus villorum	Depleted in MD-CAD	0.037	0.053	0.006	0.843	0.0214731	0.258328	0.0121891	0.112699	6.08613e-05	0.00269818
OTU 29	Verrucomicrobia	Verrucomicrobiae	Verrucomicrobiales	Verrucomicrobiaceae	Akkermansia	Akkermansia muciniphila	Depleted in MD-CAD	0.257	0.499	0.117	0.774	0.440618	0.837175	0.0208792	0.146155	0.00780387	0.0798396
OTU 450	Firmicutes	Clostridia	Clostridiales	Lachnospiraceae	Unassigned	Unassigned	Enriched in MD-CAD	0.226	0.05	0.19	0.105	0.894889	0.963591	0.0120572	0.112699	0.236201	0.523579
OTU 51	Firmicutes	Bacilli	Lactobacillales	Streptococcaceae	Streptococcus	Streptococcus salivarius	Depleted in MD-CAD	0.258	0.454	0.091	0.169	0.0939163	0.624368	0.00100282	0.0444581	0.180291	0.470172
OTU 52	Firmicutes	Negativicutes	Selenomonadales	Veillonellaceae	Megasphaera	Megasphaera elsdenii	Depleted in MD-CAD	0.165	1.621	0.21	0.278	0.920121	0.963591	0.0194279	0.146155	0.865818	0.924407
OTU 57	Firmicutes	Clostridia	Clostridiales	Ruminococcaceae	Oscillibacter	Oscillibacter valericigenes	Enriched in MD-CAD	0.299	0.136	0.412	0.212	0.523198	0.862414	0.00987968	0.109648	0.185199	0.473683
OTU 95	Bacteroidetes	Bacteroidia	Bacteroidales	Prevotellaceae	Paraprevotella	Paraprevotella clara	Enriched in MD-CAD	0.208	0.061	0.501	0.142	0.317974	0.713096	0.00623496	0.109648	0.519617	0.751185

## Sheet: Table S6
Table S6. The functional pathways predited by PICRUSt2 that significantly differed in MD-CAD and ND-CAD.
Metacyc ID	Pathway	MD-CAD: mean rel. freq. (%)	MD-CAD: std. dev. (%)	ND-CAD: mean rel. freq. (%)	ND-CAD: std. dev. (%)	P-value	P-value (corrected)	Trend in MD-CAD
LACTOSECAT-PWY	lactose and galactose degradation I	0.00162316	0.00150129	0.00597493	0.00689681	0.0122191	0.441368	Down
1CMET2-PWY	N10-formyl-tetrahydrofolate biosynthesis	0.663445	0.0491295	0.630724	0.0457611	0.0214727	0.441368	Up
SER-GLYSYN-PWY	superpathway of L-serine and glycine biosynthesis I	0.810243	0.0803255	0.746213	0.0979389	0.022355	0.441368	Up
PWY0-1241	ADP-L-glycero-&beta;-D-manno-heptose biosynthesis	0.0717384	0.0302897	0.10954	0.0662221	0.0279567	0.441368	Down
GLUCONEO-PWY	gluconeogenesis I	0.714867	0.0441287	0.680133	0.0581459	0.0329257	0.441368	Up
PWY0-1479	tRNA processing	0.0670896	0.0315287	0.0993551	0.0581469	0.0356407	0.441368	Down
MET-SAM-PWY	superpathway of S-adenosyl-L-methionine biosynthesis	0.242538	0.102346	0.315997	0.123777	0.0376632	0.441368	Down
PWY-5347	superpathway of L-methionine biosynthesis (transsulfuration)	0.309431	0.106837	0.381782	0.12128	0.0398544	0.441368	Down
PWY-5971	palmitate biosynthesis II (bacteria and plants)	0.273965	0.138736	0.380444	0.191466	0.0443599	0.441368	Down
GLUCOSE1PMETAB-PWY	glucose and glucose-1-phosphate degradation	0.0318548	0.0290731	0.0776672	0.0914844	0.0470534	0.441368	Down
PWY-5973	cis-vaccenate biosynthesis	0.935762	0.0701338	0.879816	0.10413	0.0486022	0.441368	Up
HOMOSER-METSYN-PWY	L-methionine biosynthesis I	0.177424	0.0909209	0.235641	0.101556	0.0489229	0.441368	Down
